# Supplementary material for: On the mechanism of the Rh(ii)-catalysed cyclopropanation of alkenes
Source: Royal Society of Chemistry journal article supplement (doi:10.1039/b615332a), 2007-01-01

---

**On The Mechanism of the Rh(II) Catalysed Cyclopropanation of Alkenes**

---

**James A.S. Howell**

*School of Chemistry and Physics, Lennard Jones Laboratories, Keele University, Keele,  
Staffordshire ST5 5BG, United Kingdom Fax: 44 (0)1782 712378; Tel: 44 (0)1782 583041;  
email: j.a.s.howell@keele.ac.uk.*

**ELECTRONIC SUPPLEMENTARY INFORMATION**

Supplementary Figure 1. MO Diagrams for  $\text{Rh}_2\text{X}_3(\text{CH}_2\text{X}_a)(\text{MeCl})(\text{C}_2\text{H}_4)$

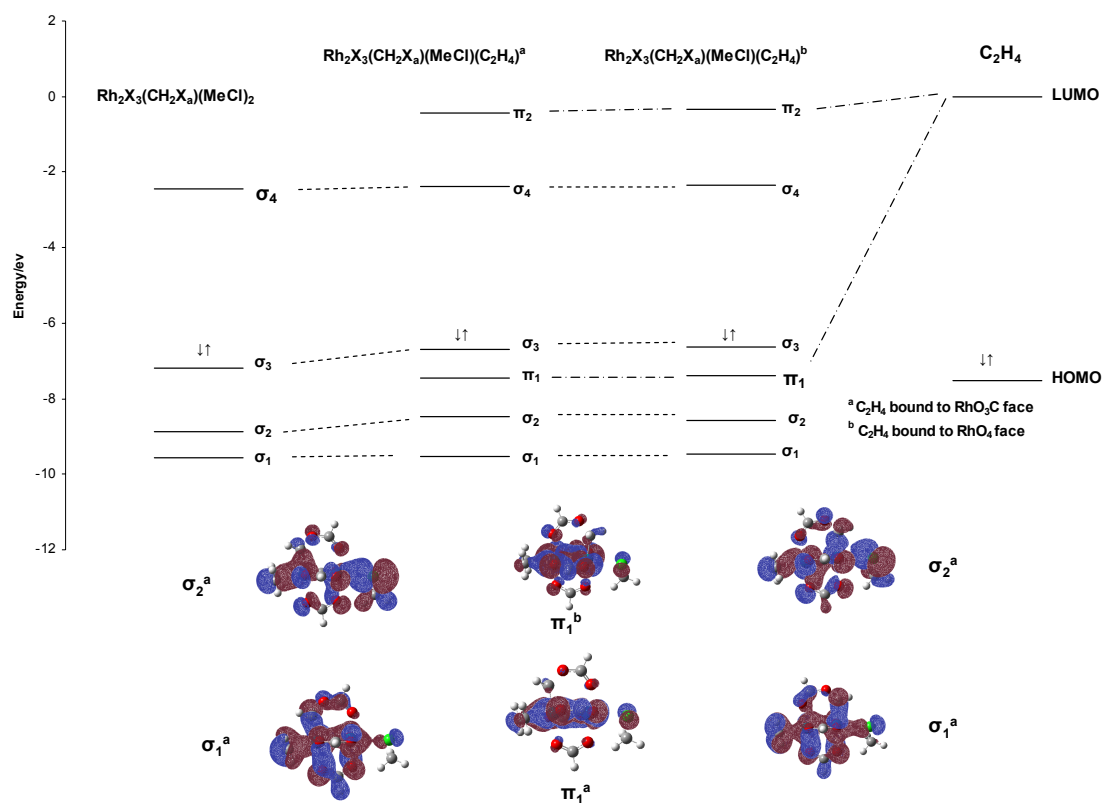

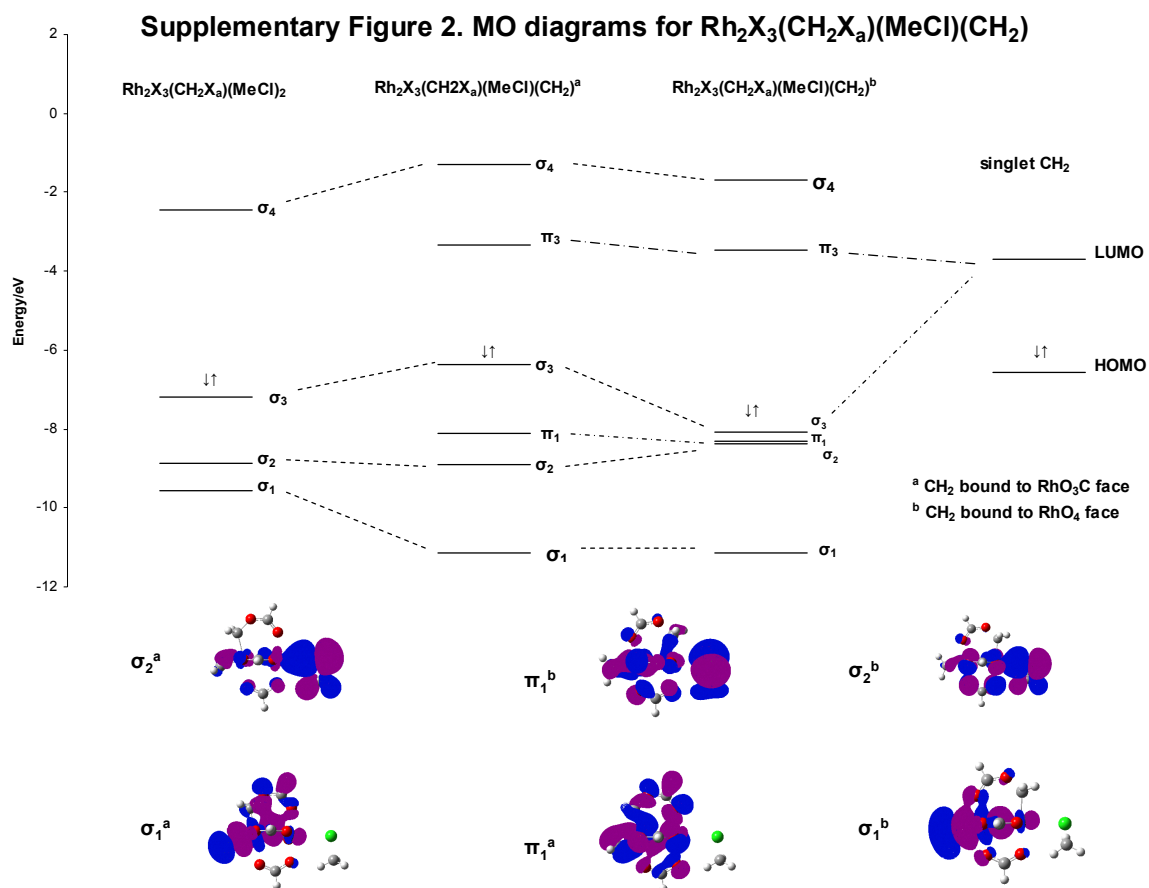

**Supplementary Figure 3. MO Diagrams for  $\text{Rh}_2\text{X}_3(\text{CH}_2\text{X}_a)(\text{MeCl})(\eta^2\text{-C}_3\text{H}_6)$**

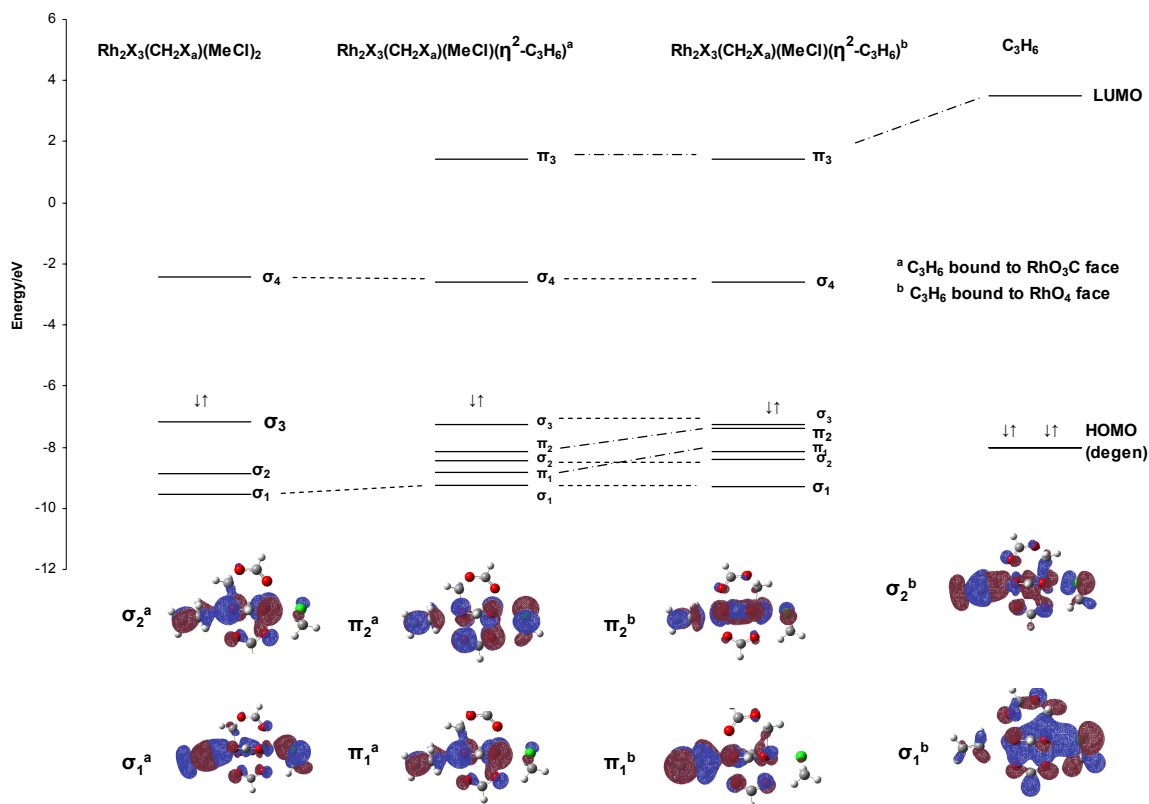

Supplementary Figure 4. MO Diagrams for  $\text{Rh}_2\text{X}_3(\text{CH}_2\text{X}_a)(\text{MeCl})(\text{C}-\text{CH}_2\text{N}_2)$

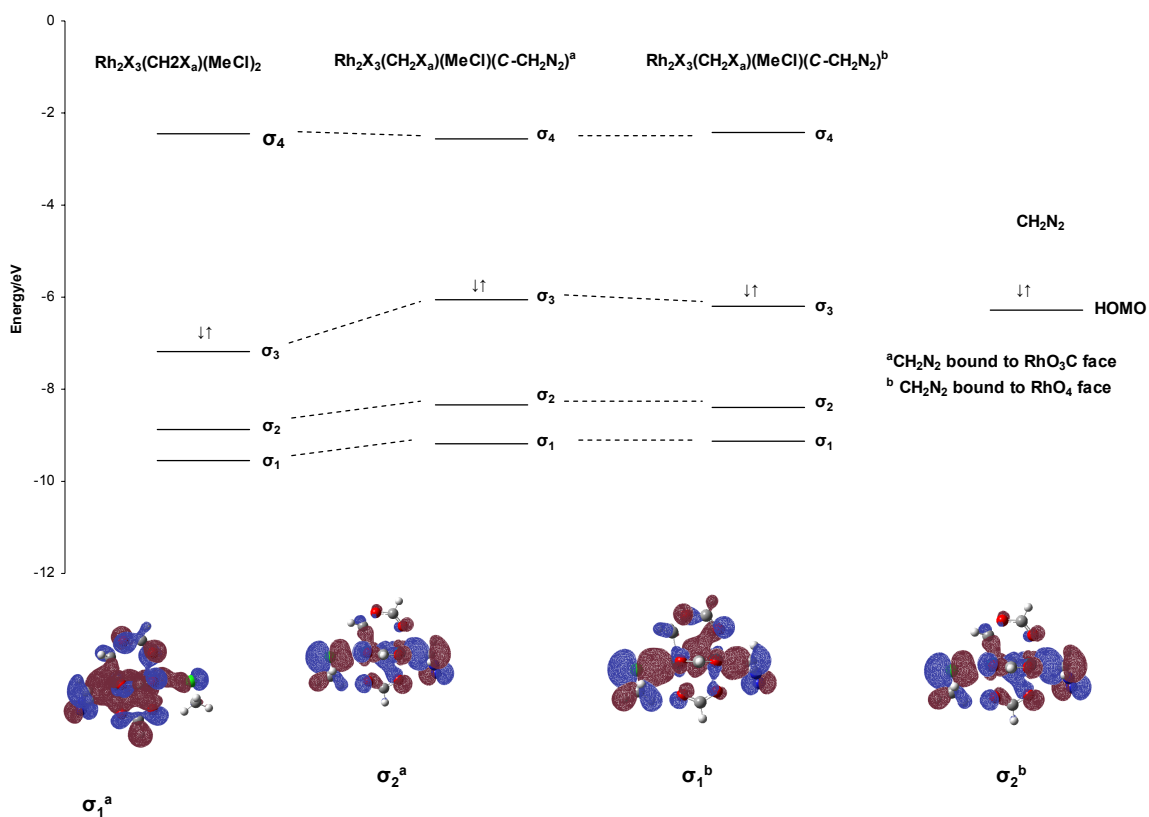

**Supplementary Figure 5. MO Diagram for  $\text{Rh}_2\text{X}_3(\text{CH}_2\text{X}_b)(\text{MeCl})$**

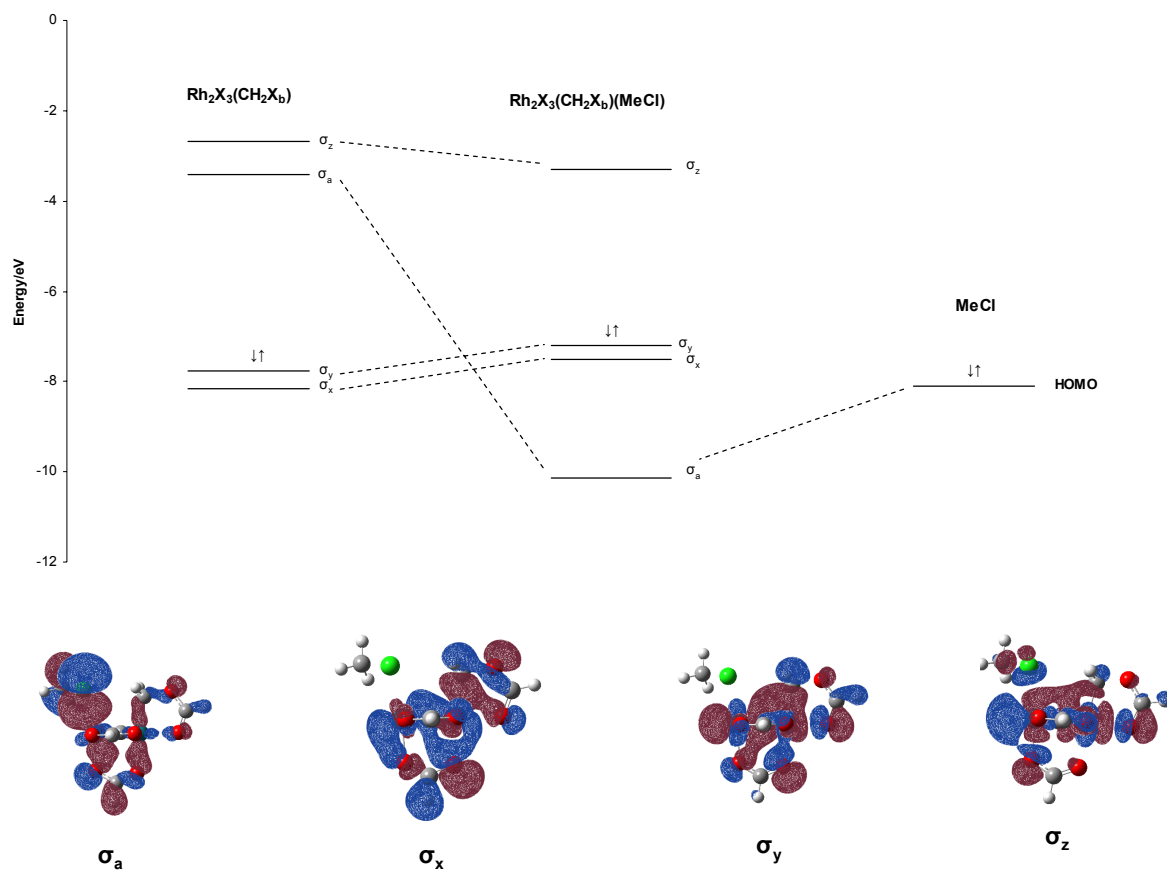

**Supplementary Figure 6. MO Diagram for  $\text{Rh}_2\text{X}_3(\text{CH}_2\text{X}_b)(\text{C}-\text{CH}_2\text{N}_2)$**

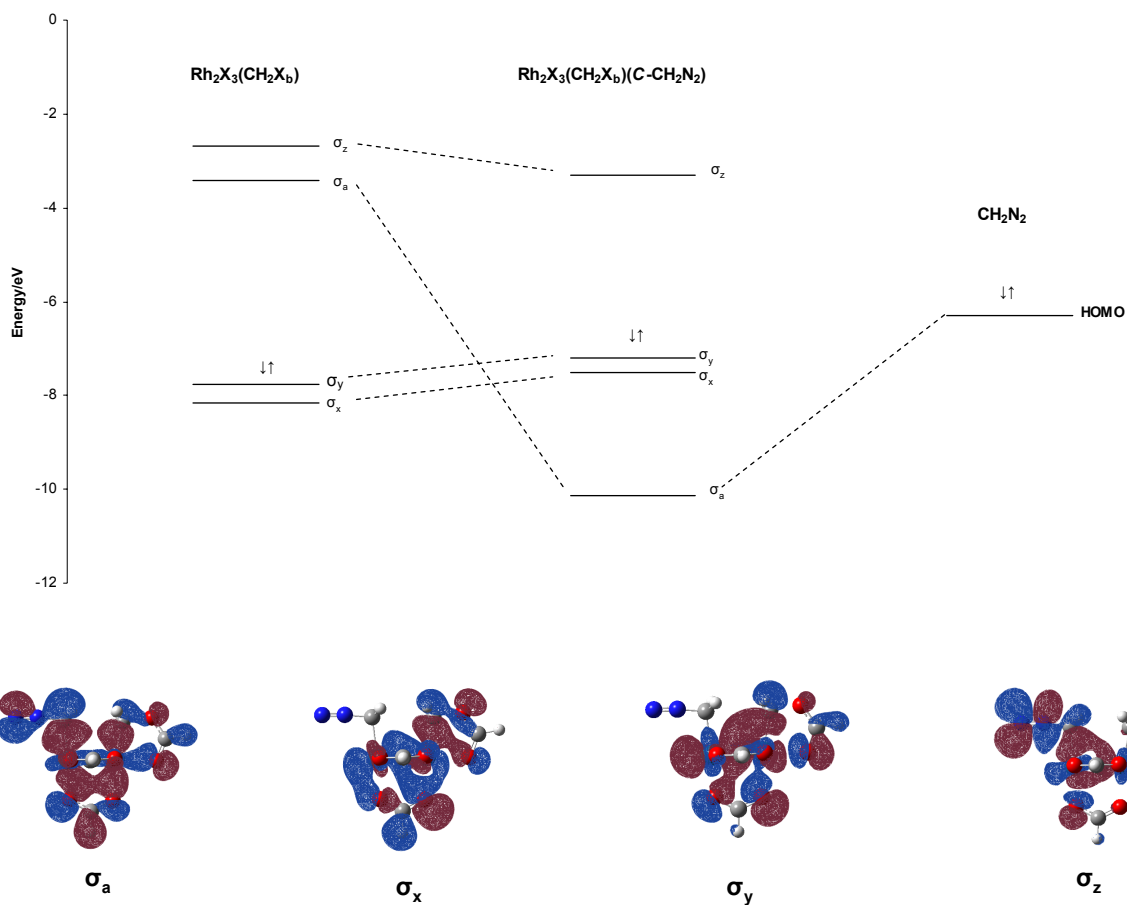

**Supplementary Figure 7. MO Diagram for  $\text{Rh}_2\text{X}_3(\text{CH}_2\text{X}_b)(\pi\text{-C}_3\text{H}_6)(\text{MeCl})$**

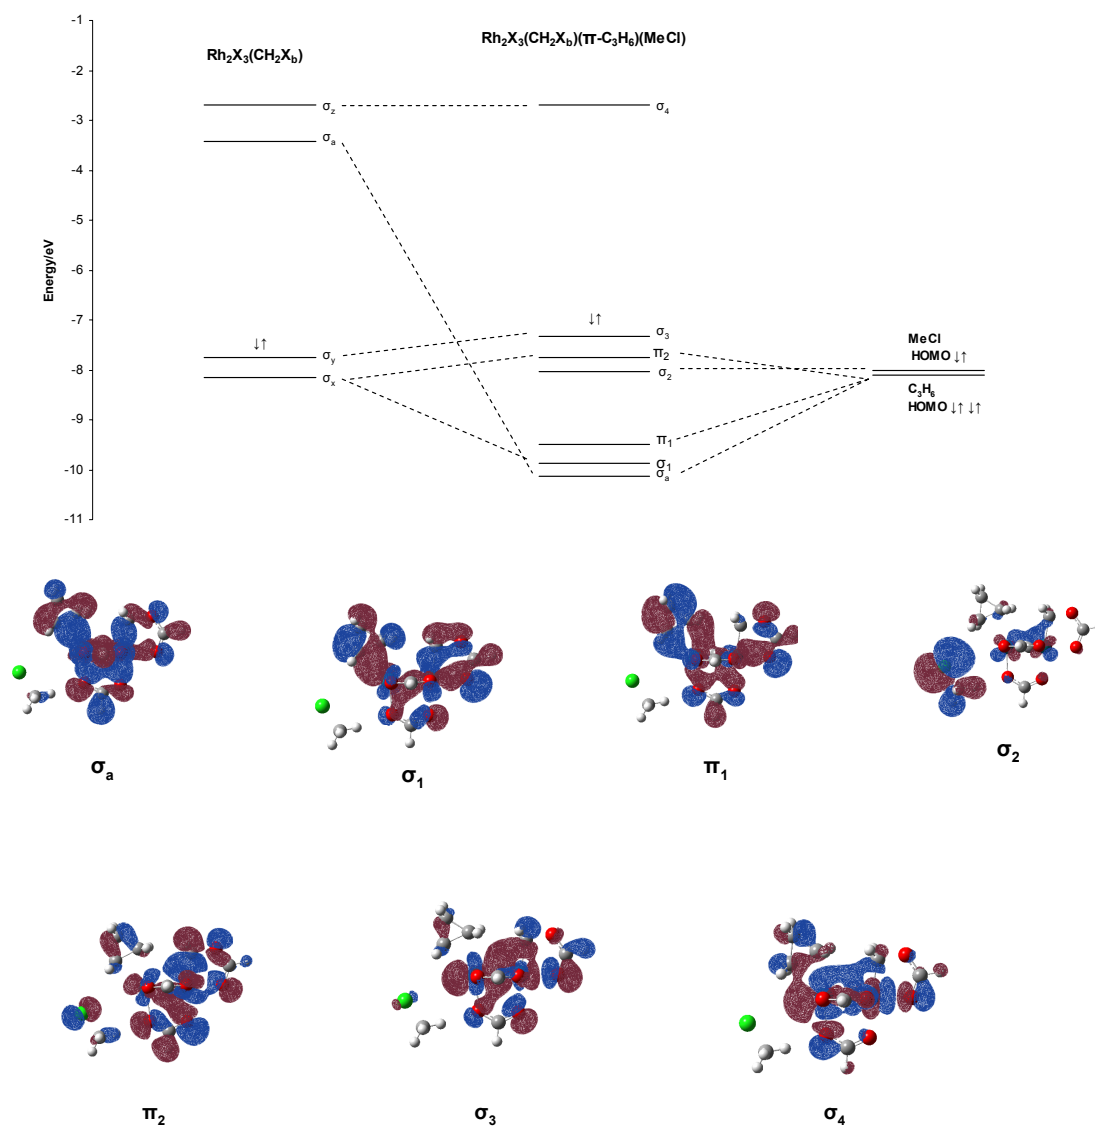



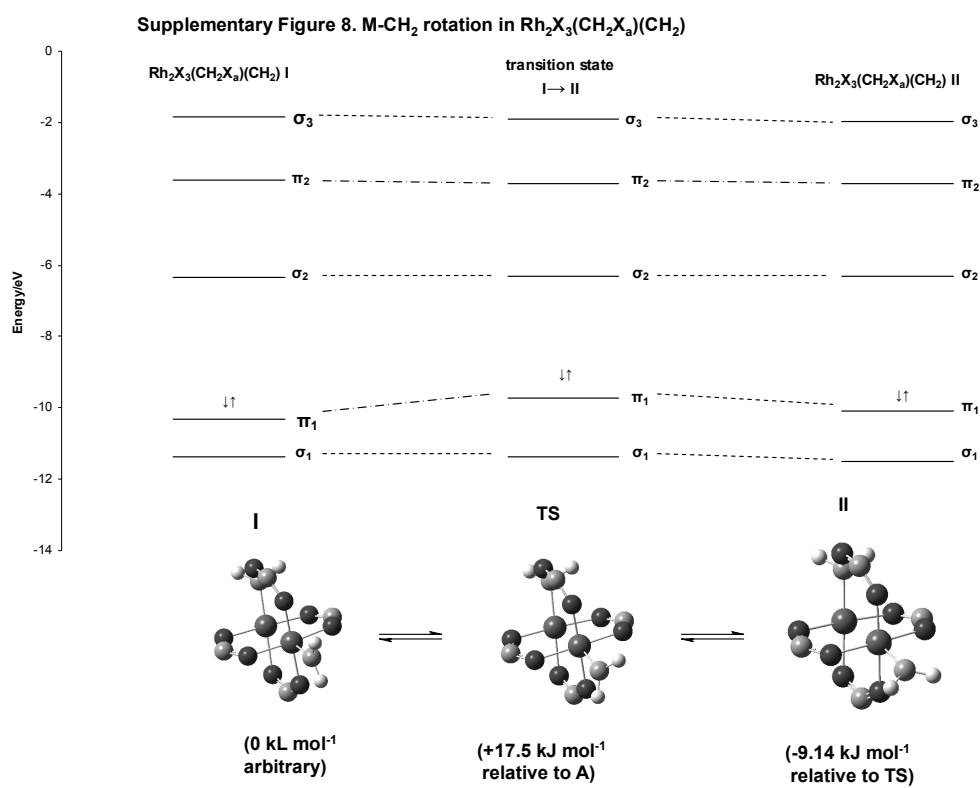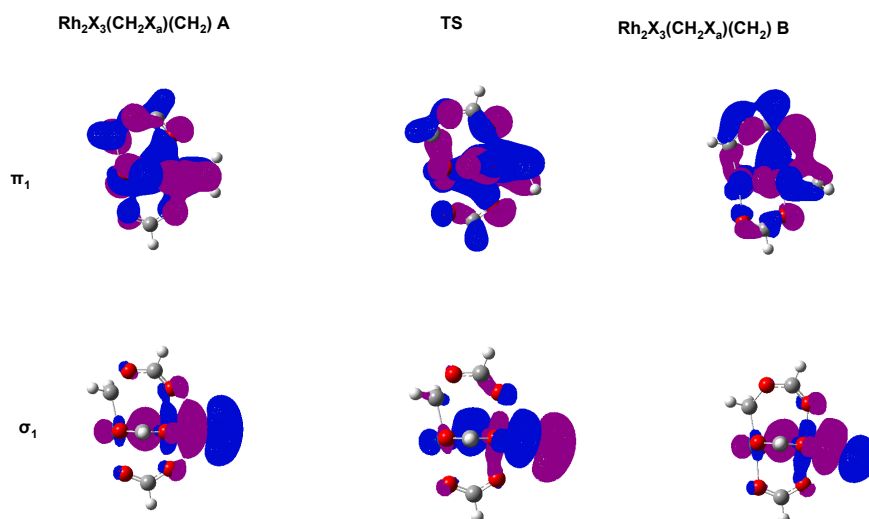

**Supplementary Figure 9. MO Diagrams of Ground State and Rotational Transition State for  $\text{Rh}_2\text{X}_3(\text{CH}_2\text{X}_b)(\text{CH}_2)$**

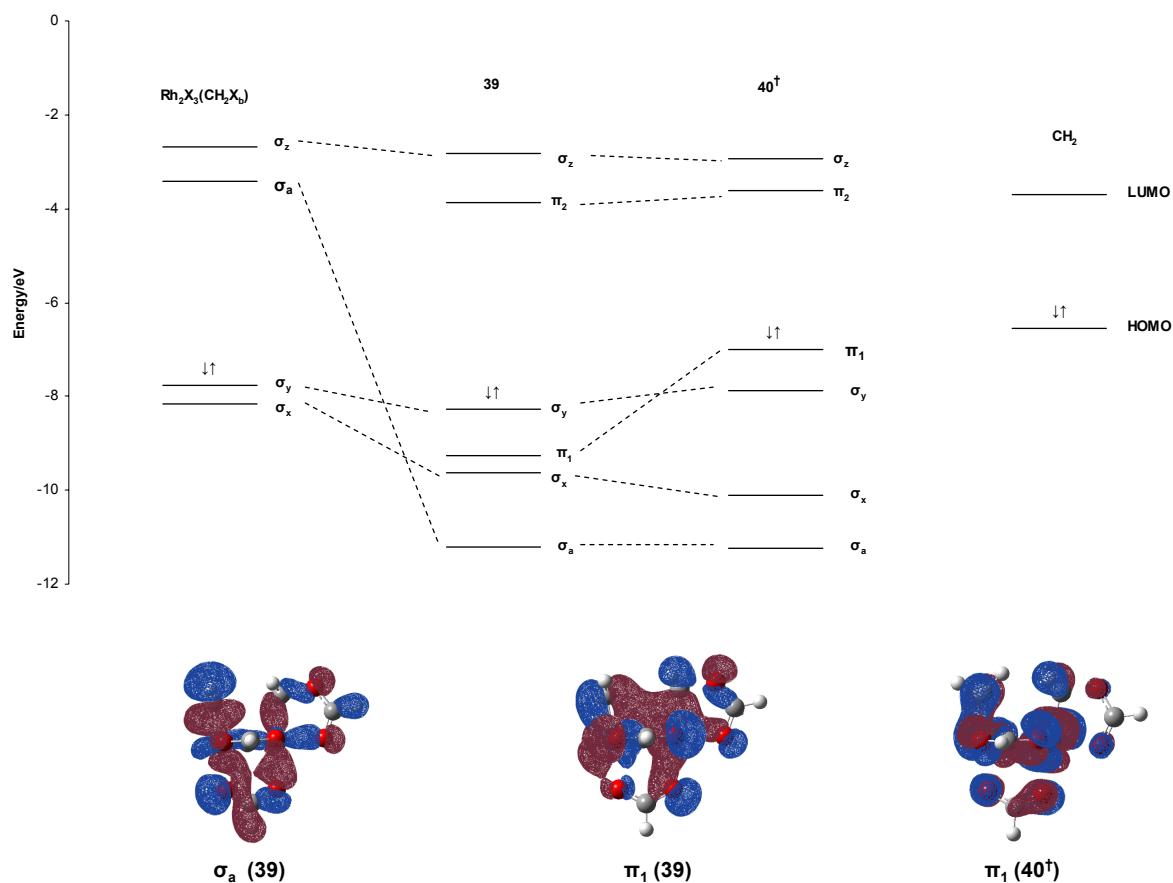

Supplement: b615332a.pdf [file b615332a.pdf]
